# Supplementary material for: Counterfactual Reasoning Deficits in Schizophrenia Patients
Source: PubMed Central journal article supplement (PMC4734710; doi:10.1371/journal.pone.0148440), 2016-02-01
Supplement: pone.0148440.s001.pdf [file pone.0148440.s001.pdf]

S1 Table. Socio-demographic and clinical measures related to CFT measures in the schizophrenia patients group (n=40).

|                                         | Causal order effect<br>(Experiment 1) <sup>a</sup> |          | Number of counterfactual<br>thoughts generated<br>(Experiment 2) |           | CIT Total score       |           |
|-----------------------------------------|----------------------------------------------------|----------|------------------------------------------------------------------|-----------|-----------------------|-----------|
|                                         | OR (95%CI)*                                        | p-value* | β (95%CI)**                                                      | p-value** | β (95%CI)**           | p-value** |
| Employment status                       |                                                    |          |                                                                  |           |                       |           |
| Employed/Student vs. Unemployed/Retired | 2.67 (0.72 to 9.95)                                | 0.792    | -0.63 (-1.29 to 0.04)                                            | 1.000     | -1.04 (-1.69 to 0.40) | 0.099     |
| Civil status                            |                                                    |          |                                                                  |           |                       |           |
| Married vs. Single/Divorced             | 1.11 (0.21 to 5.76)                                | 1.000    | 0.46 (-0.41 to 1.33)                                             | 1.000     | -0.70 (-1.61 to 0.21) | 0.838     |
| Onset of schizophrenia. years           | 0.97 (0.86 to 1.09)                                | 0.934    | 0.02 (-0.05 to 0.08)                                             | 0.963     | -0.02 (-0.08 to 0.05) | 0.971     |
| Readmissions. episodes                  | 0.99 (0.75 to 1.31)                                | 0.995    | -0.04 (-0.19 to 0.11)                                            | 1.000     | -0.02 (-0.18 to 0.14) | 0.989     |
| Suicide attempts. episodes              | 0.90 (0.48 to 1.68)                                | 0.932    | -0.01 (-0.34 to 0.32)                                            | 0.996     | 0.15 (-0.19 to 0.50)  | 1.000     |
| PANSS dimensions                        |                                                    |          |                                                                  |           |                       |           |
| Positive                                | 0.96 (0.79 to 1.16)                                | 0.953    | -0.02 (-0.12 to 0.08)                                            | 0.987     | 0.01 (-0.09 to 0.12)  | 0.970     |
| Negative                                | 0.91 (0.81 to 1.02)                                | 0.949    | -0.05 (-0.10 to 0.01)                                            | 1.000     | 0.02 (-0.04 to 0.08)  | 1.000     |
| General psychopathology                 | 0.96 (0.89 to 1.04)                                | 1.000    | -0.01 (-0.05 to 0.02)                                            | 1.000     | 0.01 (-0.03 to 0.05)  | 0.981     |
| Total                                   | 0.96 (0.94 to 1.02)                                | 0.953    | -0.01 (-0.03 to 0.01)                                            | 1.000     | 0.01 (-0.02 to 0.03)  | 1.000     |
| GAF                                     | 0.98 (0.88 to 1.09)                                | 0.949    | -0.02 (-0.08 to 0.04)                                            | 1.000     | 0.00 (-0.06 to 0.06)  | 1.000     |
| CGI-SCH                                 | 0.93 (0.76 to 1.14)                                | 1.000    | 0.00 (-0.11 to 0.11)                                             | 0.985     | 0.04 (-0.07 to 0.16)  | 1.000     |

Note. All p-values are adjusted by False Discovery Rate (FDR).

<sup>a</sup>Causal order effect assessment - 1<sup>st</sup> vs. 2<sup>nd</sup>, 3<sup>rd</sup>, 4<sup>th</sup>, reasoning blocking.

\*Logistic regression; \*\*Linear regression.
